# Supplementary material for: Spatial separation of dual-cocatalysts on bismuth vanadate for selective aerobic oxidation of benzylalcohols to benzaldehydes under visible light irradiation
Source: Royal Society of Chemistry journal article supplement (doi:10.1039/c8cy01778f), 2018-01-01
Supplement: c8cy01778f1.pdf [file c8cy01778f1.pdf]

# Spatial Separation of Dual-cocatalysts on Bismuth Vanadate for Selective Aerobic Oxidation of Benzylalcohols to Benzaldehydes Under Visible Light Irradiation

Xu Jin<sup>a</sup>, Rengui Li<sup>\*b</sup>, Yue Zhao<sup>b</sup>, Xiaodan Liu<sup>a</sup>, Xiaoqi Wang<sup>a</sup>, Hang Jiao<sup>a</sup>, Jianming Li<sup>\*a</sup>,

<sup>a</sup> Research Institute of Petroleum Exploration & Development (RIPED), PetroChina,  
No. 20 Xueyuan Road, Haidian District, Beijing, 100083, P. R. China.

<sup>b</sup> State Key Laboratory of Catalysis, Dalian Institute of Chemical Physics, Chinese  
Academy of Sciences, Dalian National Laboratory for Clean Energy, the  
Collaborative Innovation Center of Chemistry for Energy Materials (iChem-2011),  
Zhongshan Road 457, Dalian, 116023, China.

Corresponding author: Rengui Li, e-mail: [rgli@dicp.ac.cn](mailto:rgli@dicp.ac.cn); Jianming Li, e-  
mail: [lijm02@petrochina.com.cn](mailto:lijm02@petrochina.com.cn).

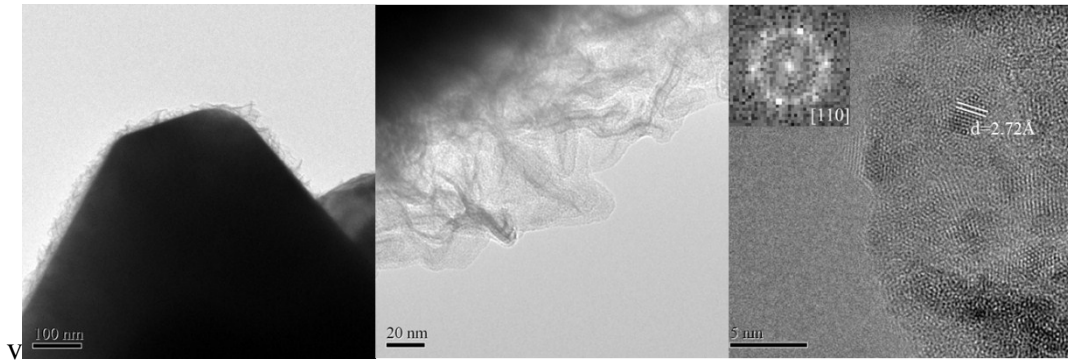

Figure S1. HRTEM images of MnO<sub>x</sub>/BiVO<sub>4</sub> deposited after photo-deposition.

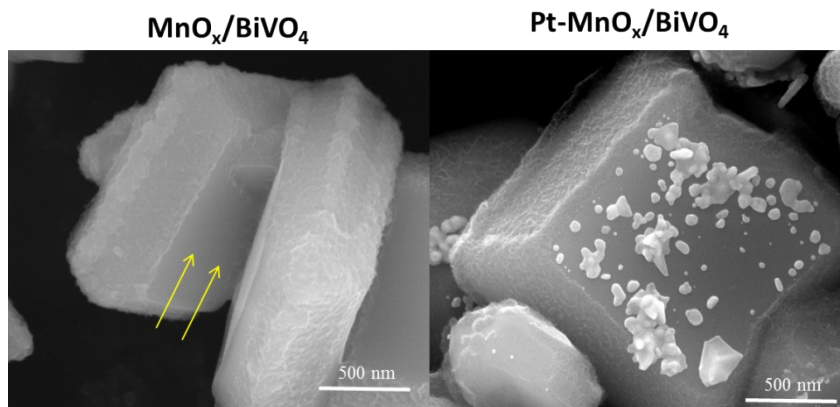

Figure S2. SEM images of  $\text{MnO}_x/\text{BiVO}_4$  and  $\text{Pt-MnO}_x/\text{BiVO}_4$ .

Table S1. Comparison of photocatalytic conversion of benzyl alcohol to benzyl aldehyde with different photocatalysts.

| Entry | Cat.                                         | Condition                                             | Con. (%) | Sel. (%) | Ref.      |
|-------|----------------------------------------------|-------------------------------------------------------|----------|----------|-----------|
| 1     | TiO <sub>2</sub>                             | UV light, H <sub>2</sub> O solvent                    | 50       | 38       | 1         |
| 2     | mpg-C <sub>3</sub> N <sub>4</sub>            | trifluorotoluene solvent;<br>O <sub>2</sub> (8 bar)   | 57       | 99       | 2         |
| 3     | HNb <sub>3</sub> O <sub>8</sub><br>nanosheet | trifluorotoluene solvent;<br>O <sub>2</sub> (1 bar)   | 20       | 99       | 3         |
| 4     | Bi <sub>2</sub> WO <sub>6</sub>              | trifluorotoluene solvent;<br>O <sub>2</sub> (0.1 MPa) | 58       | 99       | 4         |
| 5     | Bi <sub>2</sub> MoO <sub>6</sub>             | trifluorotoluene solvent;<br>O <sub>2</sub> (0.1 MPa) | 29       | 99       | 5         |
| 6     | BiVO <sub>4</sub>                            | Toluene solvent<br>O <sub>2</sub> (0.1 MPa)           | 63       | 99       | This work |

### References.

1. S. Yurdakal, G. Palmisano, V. Loddo, V. Augugliaro, L. Palmisano, *J. Am. Chem. Soc.* 130 (2008) 1568-1569.
2. F. Z. Su, S.C. Mathew, G. Lipner, X.Z. Fu, M. Antonietti, S. Blechert, X.C. Wang, *J. Am. Chem. Soc.* 132 (2010) 16299-16301.
3. S. J. Liang, L. R. Wen, S. Lin, J. H. Bi, P.Y. Feng, X. Z. Fu, L. Wu, *Angew. Chem. Int. Ed.* 53 (2014) 2951-2955.
4. Y. H. Zhang, Y. J. Xu, *RSC Adv.* 4 (2014) 2904-2910.
5. B. Zhang, J. Li, Y. Gao, R. Chong, Z. Wang, L. Guo, X. Zhang, C. Li. *J. Catal.* 345 (2017) 96–103
